# Supplementary material for: [(V IV O) 2 MII5] (M = Ni, Co) Anderson wheels
Source: Royal Society of Chemistry journal article supplement (doi:10.1039/d1dt01710a), 2021-01-01
Supplement: d1dt01710a1.pdf [file d1dt01710a1.pdf]

Supplementary Information

## $[(V^{IV}O)_2M^{II}_5]$ ( $M = Ni, Co$ ) Anderson wheels

Hector W. L. Fraser,<sup>a</sup> Emily H. Payne,<sup>a</sup> Arup Sarkar,<sup>b</sup> Lucinda R. B. Wilson,<sup>a</sup> Dmitri Mitcov,<sup>c</sup> Gary S. Nichol,<sup>a</sup> Gopalan Rajaraman,<sup>\*b</sup> Stergios Piligkos<sup>\*c</sup> and Euan K. Brechin<sup>\*a</sup>

- EaStCHEM School of Chemistry, The University of Edinburgh, David Brewster Road, Edinburgh, EH9 3FJ Scotland, UK. E-mail: [E.Brechin@ed.ac.uk](mailto:E.Brechin@ed.ac.uk)*
- Department of Chemistry, Indian Institute of Technology Bombay, Powai, Mumbai 400076, India. E-mail: [rajaraman@chem.iitb.ac.in](mailto:rajaraman@chem.iitb.ac.in)*
- Department of Chemistry, University of Copenhagen, Universitetsparken 5, 2100 Copenhagen, Denmark. Email: [piligkos@chem.ku.dk](mailto:piligkos@chem.ku.dk)*
- WestCHEM School of Chemistry, University of Glasgow, University Avenue, Glasgow G12 8QQ, Scotland, UK.*

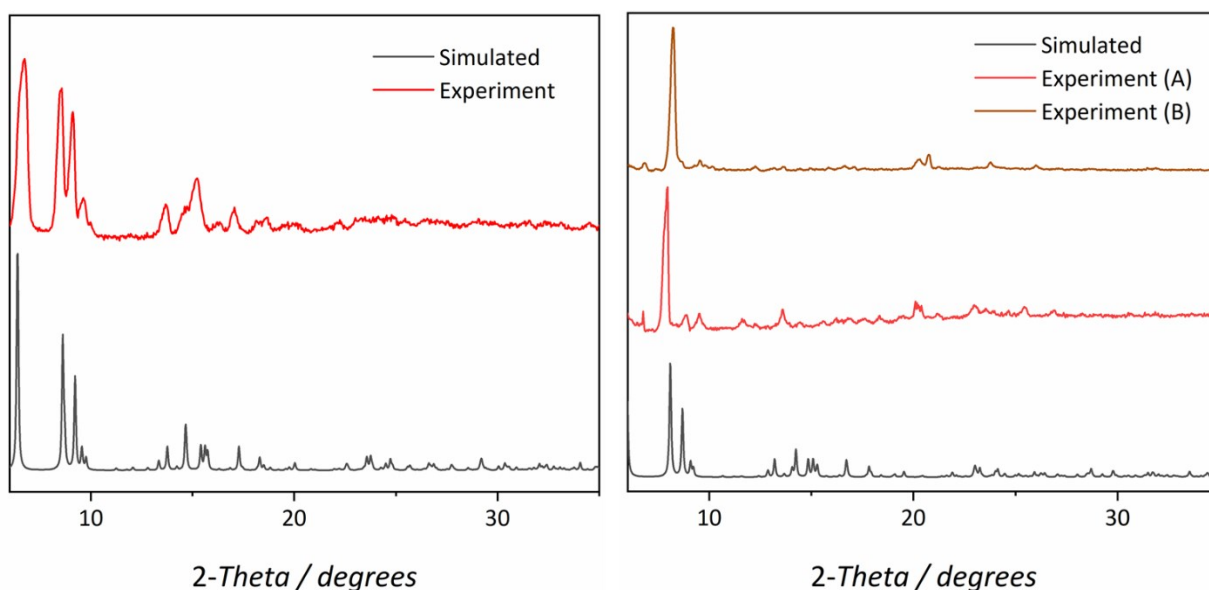

**Figure S1.** Powder XRD patterns for complex **1** (left) and **2** (right). The latter desolvates rapidly as observed in partially dried sample (A) and fully dried sample (B).

**Table S1.** Selected structural parameters for the bridging motifs between the metal ion pairs in compound **1**. These include: V-O bond length, M-O bond length, M-Cl bond length, M-O-M bond angle and M-Cl-M bond angle.

|       | V-O (Å)      | M-O (Å)      | M-Cl (Å)     | M-O-M (°)     | M-Cl-M (°) |
|-------|--------------|--------------|--------------|---------------|------------|
| V1/M1 | 1.969, 2.057 | 1.995, 2.094 | -            | 95.93, 102.11 | -          |
| V1/M2 | 2.057, 2.177 | 2.094, 2.122 | -            | 98.29, 101.24 | -          |
| V1/M3 | 2.014, 2.177 | 2.028, 2.090 | -            | 96.81, 104.27 | -          |
| M1/M3 | -            | 2.041, 2.081 | 2.405, 2.413 | 103.18        | 84.20      |
| M1/M2 | -            | 2.053-2.122  | -            | 95.82, 98.33  | -          |
| M2/M3 | -            | 2.041-2.094  | -            | 97.40, 100.28 | -          |

**Table S2.** Selected structural parameters for the bridging motifs between the metal ion pairs in compound **2**. These include: V-O bond length, M-O bond length, M-Cl bond length, M-O-M bond angle and M-Cl-M bond angle.

|       | V-O (Å)      | M-O (Å)      | M-Cl (Å)     | M-O-M (°)     | M-Cl-M (°) |
|-------|--------------|--------------|--------------|---------------|------------|
| V1/M1 | 1.969, 2.054 | 2.010, 2.133 | -            | 96.05, 102.98 | -          |
| V1/M2 | 2.054, 2.180 | 2.115, 2.170 | -            | 99.09, 101.33 | -          |
| V1/M3 | 2.013, 2.180 | 2.026, 2.126 | -            | 96.68, 105.61 | -          |
| M1/M3 | -            | 2.078, 2.108 | 2.422, 2.455 | 102.91        | 84.34      |
| M1/M2 | -            | 2.075-2.170  | -            | 94.18, 97.78  | -          |
| M2/M3 | -            | 2.075-2.126  | -            | 97.17, 99.97  | -          |

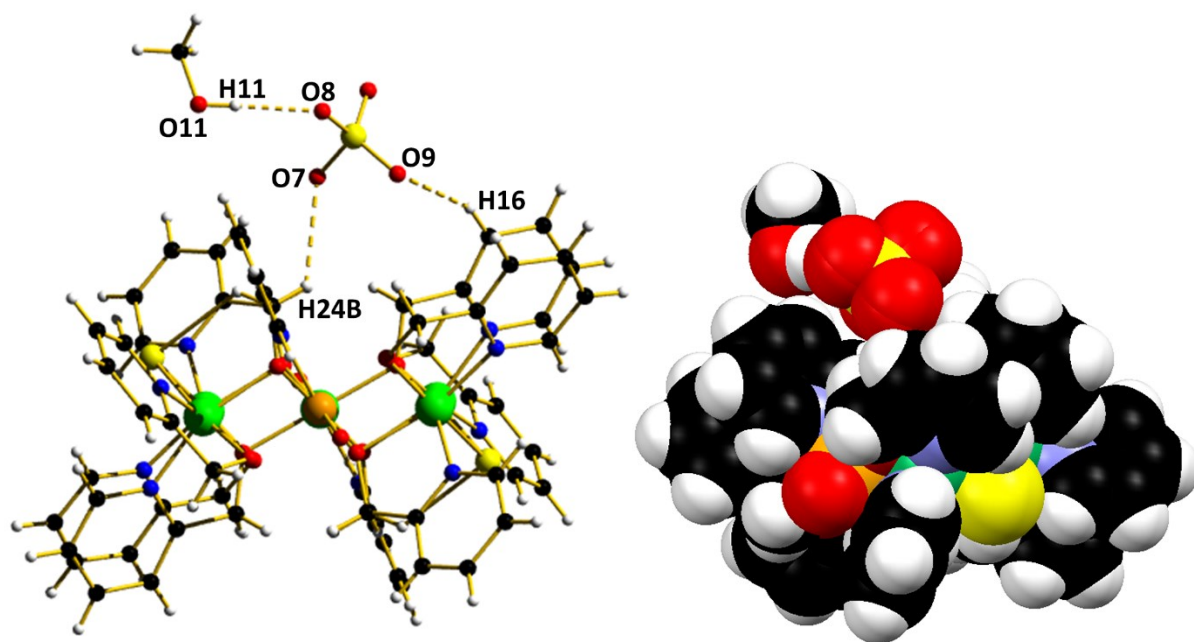

**Figure S2.** Illustration of the interaction between the MeOH molecules of crystallisation, the  $\text{ClO}_4^-$  anions and the cation in **1**. Colour code as Figure 1.  $\text{O8}\cdots\text{H11} = 2.208 \text{ \AA}$ ,  $\text{O7}\cdots\text{H24B} = 2.595 \text{ \AA}$ ,  $\text{O9}\cdots\text{H16} = 2.595 \text{ \AA}$ . The image on the right is the equivalent space-fill representation.

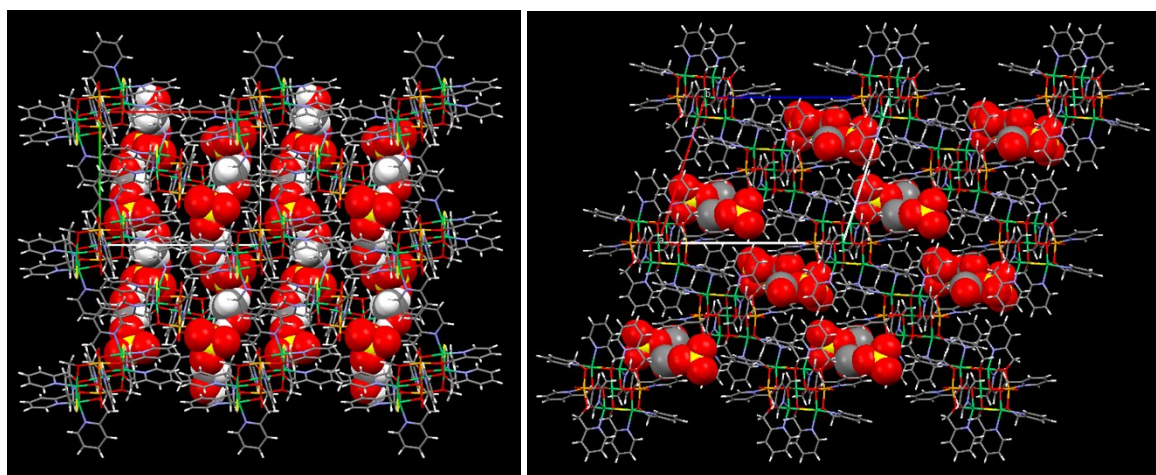

**Figure S3.** View of the extended structure in complex **1** down the *c* (left) and *b* (right) axes of the unit cell. The anions and solvent of crystallisation are depicted in space-fill and the cluster cations as capped sticks. Colour code as Figure 1.

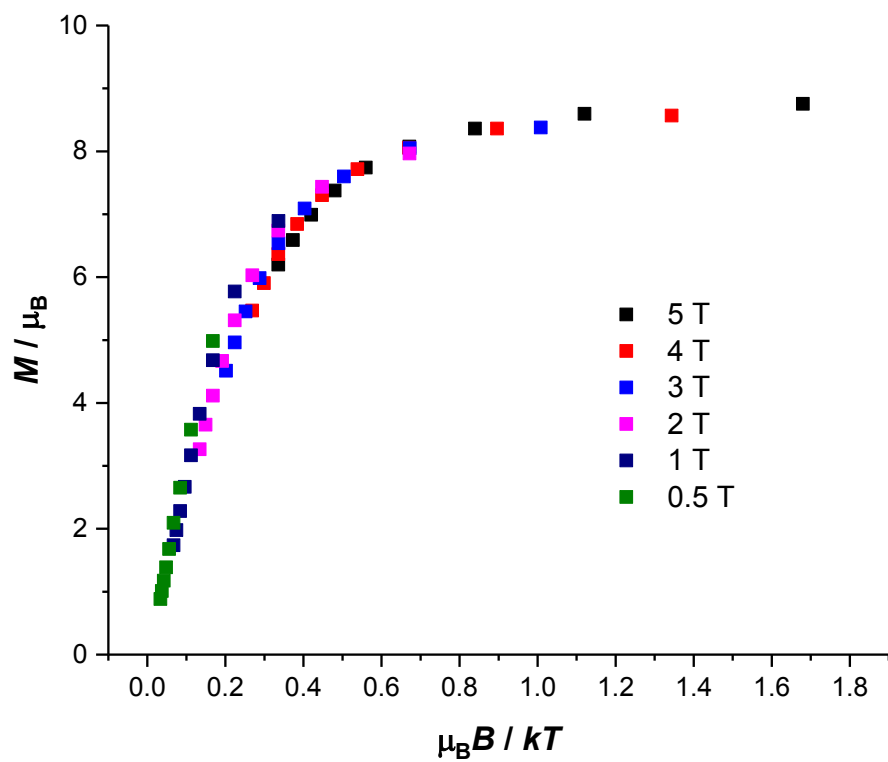

**Figure S4.** Reduced magnetisation data of **1**, showing no nesting of the VTUV curves, as discussed in the main text.

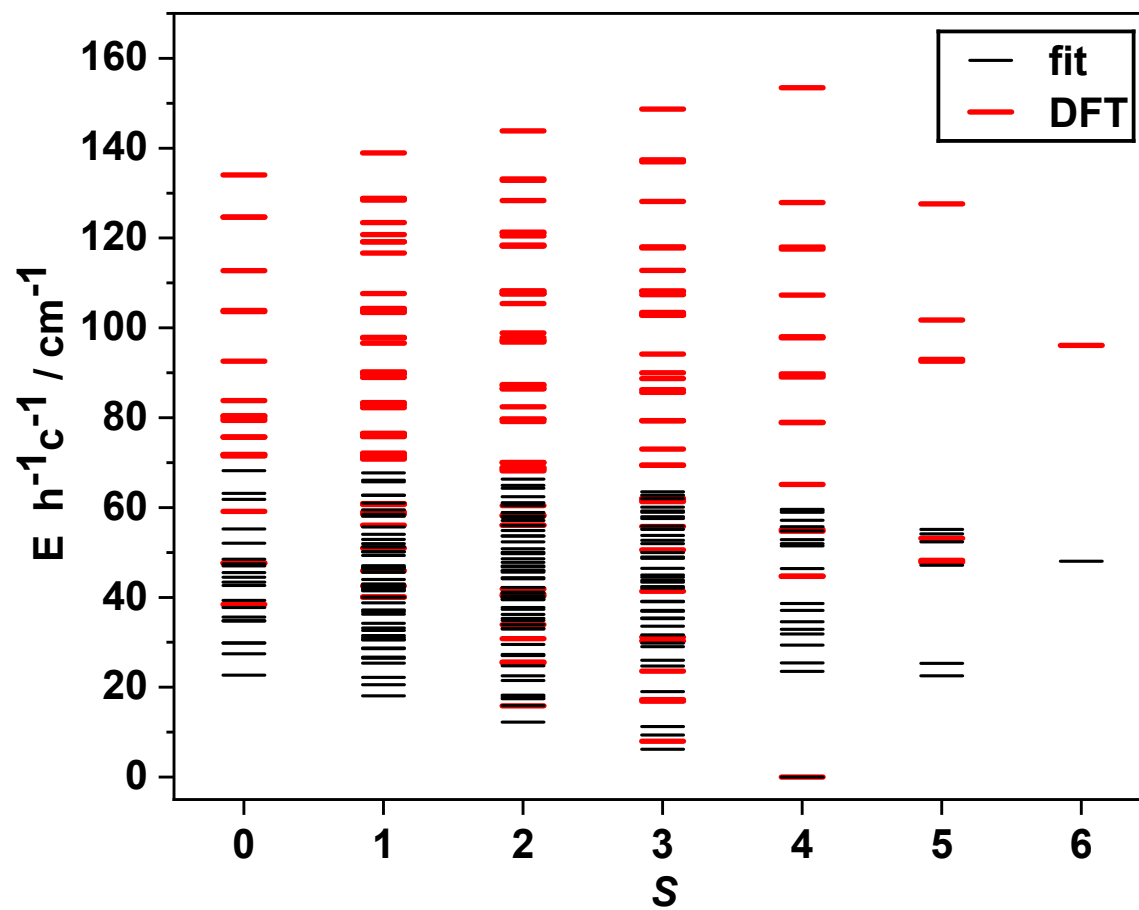Figure S5: Spin eigenstates of **1**, obtained as explained in the main text.

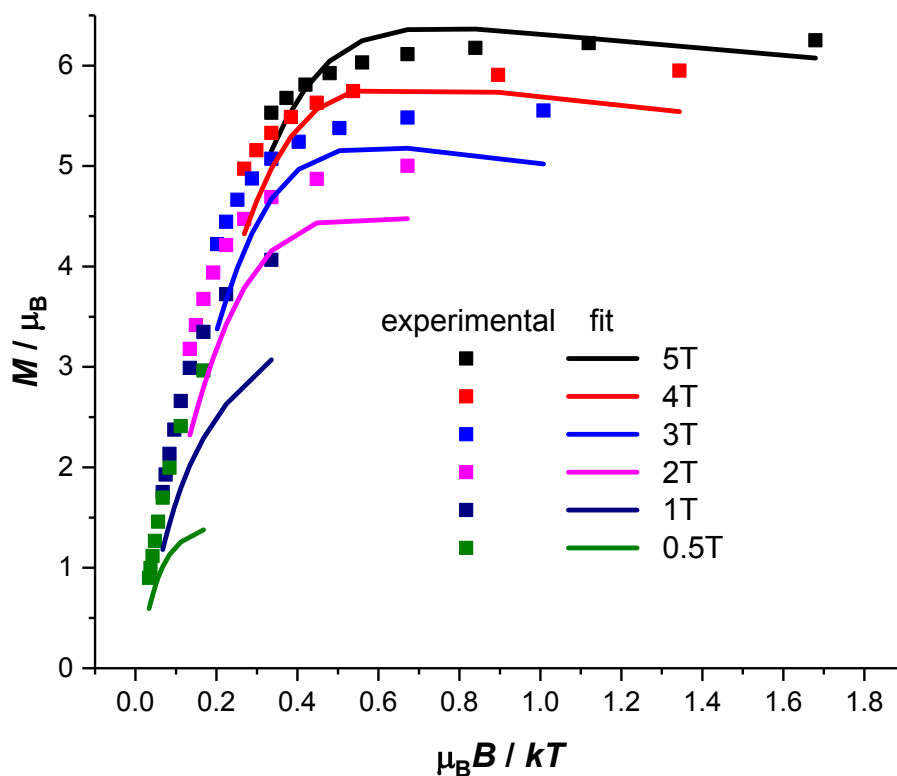

**Figure S6.** Reduced magnetisation data of **2**, showing significant nesting of the VTVB curves, and failure to model the VTVB curves with the parameters determined from fitting the temperature dependence of the  $\chi T$  product, as discussed in the main text.

|     | M1 | 2 | 3 | 4 | 5 | V1 | V2 | Total Spin |
|-----|----|---|---|---|---|----|----|------------|
| HS  | ↑  | ↑ | ↑ | ↑ | ↑ | ↑  | ↑  | 6          |
| BS1 | ↑  | ↓ | ↑ | ↑ | ↓ | ↑  | ↑  | 2          |
| BS2 | ↑  | ↑ | ↑ | ↑ | ↑ | ↓  | ↓  | 4          |
| BS3 | ↓  | ↑ | ↑ | ↑ | ↑ | ↑  | ↑  | 4          |
| BS4 | ↓  | ↑ | ↑ | ↑ | ↑ | ↓  | ↓  | 2          |

**Scheme S1.** Schematic diagram of the high spin and broken symmetry arrangements of the metal ion spins in **1** and **2** used for DFT calculations.

**Table S3.** Mulliken spin density values computed from B3LYP/TZV level of theory on the respective Ni<sup>II</sup> and V<sup>IV</sup> centres in **1** obtained from high spin and four broken symmetry calculations. The numbers beside the atoms are according to scheme 1.

| Spin density | Ni1(centre) | Ni2    | Ni3   | Ni4   | Ni5    | V1     | V2     | $\langle S^2 \rangle$ |
|--------------|-------------|--------|-------|-------|--------|--------|--------|-----------------------|
| HS           | 1.740       | 1.677  | 1.666 | 1.666 | 1.677  | 1.128  | 1.128  | 42.05                 |
| BS1          | 1.742       | -1.675 | 1.674 | 1.674 | -1.675 | 1.127  | 1.127  | 10.03                 |
| BS2          | 1.738       | 1.663  | 1.671 | 1.671 | 1.663  | -1.132 | -1.132 | 22.03                 |
| BS3          | -1.738      | 1.667  | 1.677 | 1.677 | 1.667  | 1.129  | 1.129  | 22.04                 |
| BS4          | -1.740      | 1.671  | 1.664 | 1.664 | 1.671  | -1.131 | -1.131 | 10.02                 |

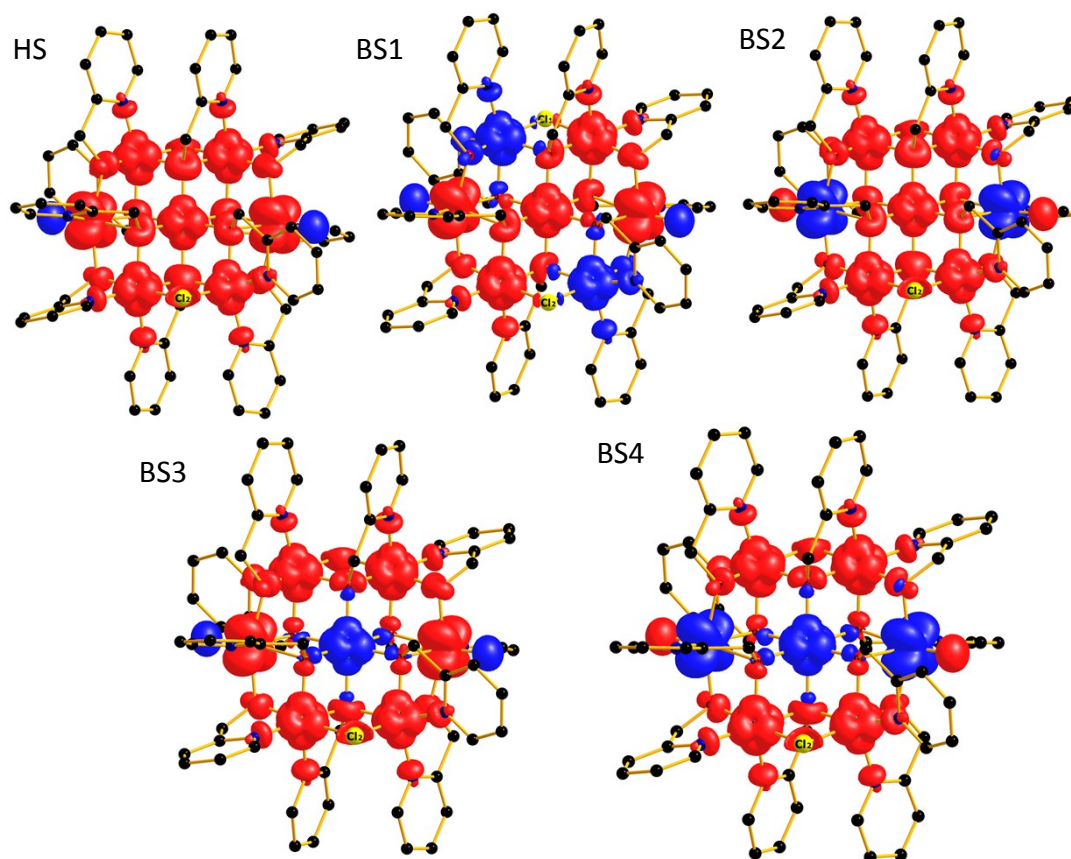

**Figure S7.** Spin density plots of complex **1** of the HS, BS1, BS2, BS2 (top) and BS3, BS4 (bottom) with an iso-surface value of 0.0065 e/Bohr<sup>3</sup>. Hydrogen atoms are removed for clarity.

**Table S4:** Selected overlap integral ( $S_{\alpha\beta}$ ) values between the Ni<sup>II</sup> and V<sup>IV</sup> atomic orbitals in **1**.

| MO number | Ni ( $\alpha$ )                                                                                                | MO number | V ( $\beta$ )                  | $S_{\alpha\beta}$ |
|-----------|----------------------------------------------------------------------------------------------------------------|-----------|--------------------------------|-------------------|
| 403       | Ni5( $d_{x^2-y^2}$ ), Ni3( $d_{z^2}$ ),<br>Ni2( $d_{x^2-y^2}$ ), Ni4( $d_{z^2}$ )                              | 398       | V1( $d_{xy}$ ), V2( $d_{xy}$ ) | 0.0744            |
| 402       | Ni5( $d_{x^2-y^2}$ ), Ni3( $d_{x^2-y^2}$ ),<br>Ni2( $d_{x^2-y^2}$ ), Ni4( $d_{x^2-y^2}$ ),<br>Ni1( $d_{z^2}$ ) | 397       | V1( $d_{xy}$ ), V2( $d_{xy}$ ) | 0.0630            |
| 395       | Ni5( $d_{xz}$ ), Ni3( $d_{xz}$ ),<br>Ni2( $d_{xz}$ ), Ni4( $d_{xz}$ )                                          | 397       | V1( $d_{xy}$ ), V2( $d_{xy}$ ) | -0.0982           |
| 371       | Ni5( $d_{yz}$ ), Ni3( $d_{xy}$ ),<br>Ni2( $d_{xy}$ ), Ni4( $d_{yz}$ ),<br>Ni1( $d_{xz}$ )                      | 397       | V1( $d_{xy}$ ), V2( $d_{xy}$ ) | 0.0710            |



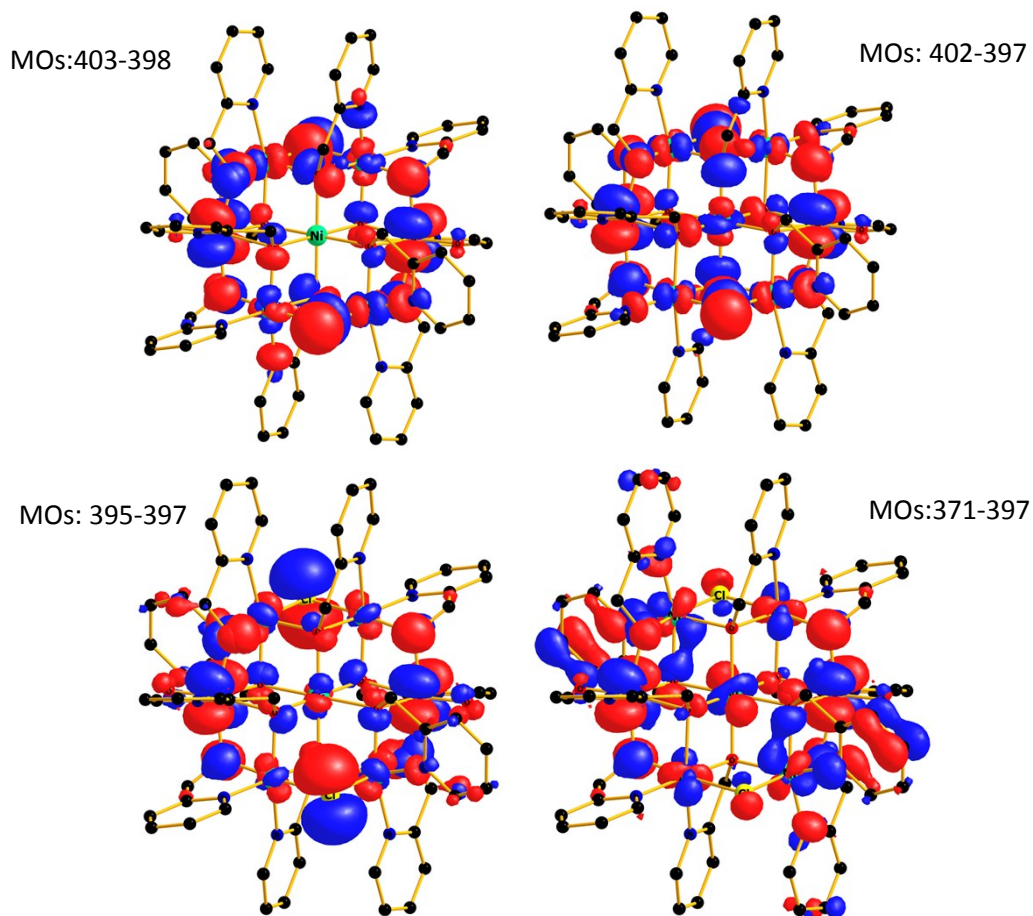

**Figure S8.** Orbital overlap diagrams of the five Ni(II) centres and two V(IV) centres (iso-surface value 0.03 e/bohr<sup>3</sup>) for complex **1**.

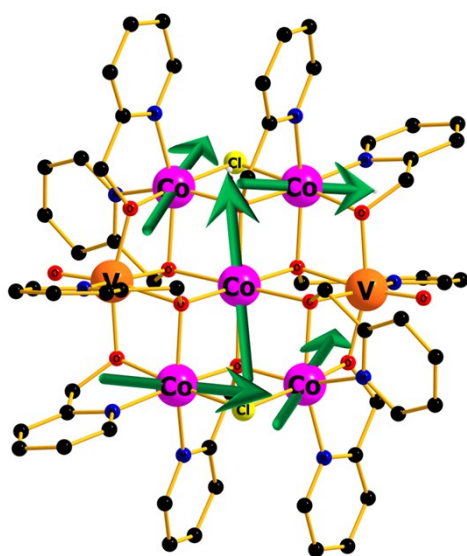

**Figure S9.** NEVPT2 computed  $D_{zz}$  orientations plotted on each Co<sup>II</sup> ion in complex **2**.

**Table S5:** Wavefunction analysis, statewise energies and their corresponding contribution towards axial and rhombic ZFS parameters for the central Co<sup>II</sup> ion (M2 in Figure 1) of complex **2** (only up to 4<sup>th</sup> excited state shown).

| States             | Energy (cm <sup>-1</sup> ) | CASSCF wavefunction (major contribution)                                                                 | Contribution to <i>D</i> (cm <sup>-1</sup> ) | Contribution to <i>E</i> (cm <sup>-1</sup> ) |
|--------------------|----------------------------|----------------------------------------------------------------------------------------------------------|----------------------------------------------|----------------------------------------------|
| GS                 | 0.0                        | $d_{yz}^2d_{xz}^2d_{xy}^1d_z^1d_{x^2-y^2}^1$ (58%)                                                       | 0.00                                         | 0.00                                         |
| 1 <sup>st</sup> ES | 618.9                      | $d_{yz}^2d_{xz}^1d_{xy}^2d_z^1d_{x^2-y^2}^1$ (46%)<br>$d_{yz}^2d_{xz}^2d_{xy}^1d_z^1d_{x^2-y^2}^1$ (15%) | 38.0                                         | 34.23                                        |
| 2 <sup>nd</sup> ES | 1293.5                     | $d_{yz}^1d_{xz}^2d_{xy}^2d_z^1d_{x^2-y^2}^1$ (62%)                                                       | 24.3                                         | -18.30                                       |
| 3 <sup>rd</sup> ES | 6963.4                     | $d_{yz}^1d_{xz}^2d_{xy}^1d_z^1d_{x^2-y^2}^2$ (44%)<br>$d_{yz}^2d_{xz}^1d_{xy}^1d_z^1d_{x^2-y^2}^2$ (22%) | 6.3                                          | 1.21                                         |
| 4 <sup>th</sup> ES | 7973.3                     | $d_{yz}^2d_{xz}^1d_{xy}^1d_z^1d_{x^2-y^2}^2$ (44%)<br>$d_{yz}^2d_{xz}^1d_{xy}^1d_z^2d_{x^2-y^2}^1$ (22%) | 4.0                                          | 0.64                                         |

### Mass Spectrometry

Mass spectrometry was performed on a 12 T SolariXr FT-ICR MS (Bruker Daltonics, Bremen, Germany) with an ESI source. The spectrum was acquired in positive ion mode (ESI+). The broadband spectrum was acquired with 16 summed scans between 98.3 *m/z* and 3000 *m/z*. Samples were solubilized in acetonitrile at 50 μM and sprayed by direct infusion into the ESI source. Data were analysed using MassLynx v4.1 software.

Electrospray ionisation mass spectrometry (ESI-MS) was carried out on a solution of **1** dissolved in acetonitrile, with the results showing that compound **1** is stable in solution as [M]<sup>2+</sup> (Figure S11). The most intense peak in the spectrum corresponds to the ion [M]<sup>2+</sup> where M = [(VO)<sub>2</sub>Ni<sub>5</sub>(hmp)<sub>10</sub>Cl<sub>2</sub>] and appears at *m/z* = 788.96. This can be attributed to the unfragmented 2+ cationic part of the complex, after loss of the two perchlorate counter ions and solvated methanol. No other peaks could be identified from the spectrum. The observed solution stability of **1** is in agreement with the findings from the mass spectrometry and solution-state NMR spectroscopy for the related heterometallic Anderson wheels of general formula [M<sup>III</sup><sub>2</sub>M<sup>II</sup><sub>5</sub>(hmp)<sub>12</sub>]<sup>4+</sup> (where M<sup>III</sup> = Cr, Al and M<sup>II</sup> = Mn, Fe, Co, Ni, Cu, Zn) as described in reference 11 (main text). Consistent with the PXRD data (Figure S1) the structure of **2** is unstable outside the mother liquor, desolvating rapidly and the mass spectrum of the redissolved powder (in MeCN) shows no sign of the [M]<sup>2+</sup> (where M = [(VO)<sub>2</sub>Co<sub>5</sub>(hmp)<sub>10</sub>Cl<sub>2</sub>]).

Supplementary Information

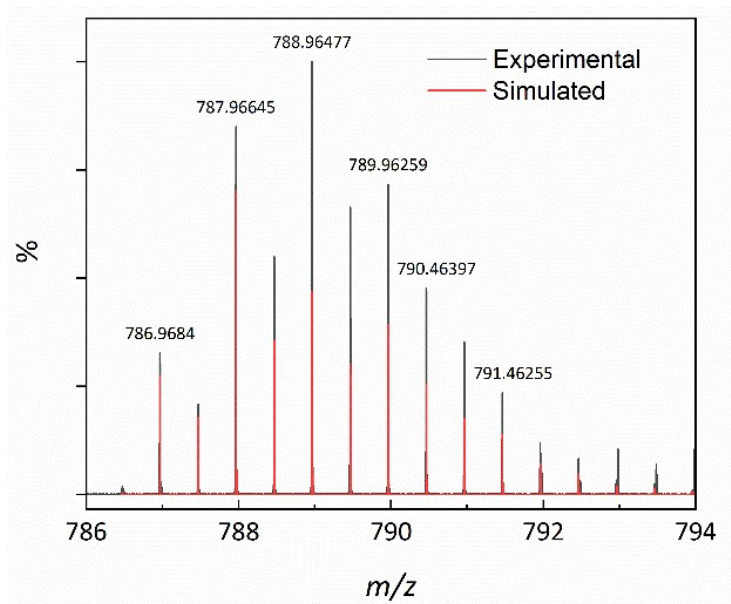

**Figure S10.** Experimental (black) and simulated (red) peaks for the partial mass spectrum of **1**, showing the unfragmented  $[M]^{2+}$  ion.
